# Supplementary material for: Characterization of Histone H3 Gene Family Reveals That GmHH3-3 is Associated With Higher Seed Weight in Glycine max
Source: Front Genet. 2022 Jul 22;13:949027. doi: 10.3389/fgene.2022.949027 (PMC9353304; doi:10.3389/fgene.2022.949027)
Supplement: Supplementary file 1 [file Table1.XLSX]

## Sheet: Table S1
			SNP information and KASP marker detail
			>GmHH3-3 (CDS in W-82)
			ATGGCTCGAACGAAGCAAACGGCCCGCAAGTCCACCGGCGGCAAGGCGCCGCGGAAGCAGCTGGCGACTAAGGCGGCTCGCAAGTCGGCTCCGGCGACCGGCGGCGTGAAGAAGCCGCACAGATTCAGGCCGGGAACCGTGGCGCTGCGCGAGATCCGGAAGTATCAGAAGAGCACGGAGCTACTCATCCGGAAGCTTCCGTTCCAGCGCTTGGTCCGCGAGATCGCGCAGGACTTCAAGACCGACCTCCGGTTCCAGAGCTCCGCCGTCTCCGCGCTCCAGGAGGCCGCCGAGGCTTACTTGGTCGGTCTCTTCGAAGACACGAACCTCTGCGCCATTCATGCCAAGCGTGTTACTATCATGCCCAAGGACATTCAGCTCGCCAGGCGCATTAGGGGC…
			>GmHH3-3 (CDS in LEE)
			ATGGCTCGAACGAAGCAAACGGCCCGCAAGTCAACCGGCGGCAAGGCGCCGCGGAAGCAGCTGGCGACTAAGGCGGCTCGCAAGTCGGCTCCGGCGACCGGCGGCGTGAAGAAGCCGCACAGATTCAGGCCGGGAACCGTGGCGCTGCGCGAGATCCGGAAGTACCAGAAGAGCACGGAGCTACTCATCCGGAAGCTTCCGTTCCAGCGCTTGGTCCGAGAGATCGCGCAGGACTTCAAGACCGACCTCCGGTTCCAGAGCTCCGCCGTCTCCGCGCTCCAGGAGGCCGCCGAGGCTTACTTGGTCGGTCTCTTCGAAGACACGAACCTCTGCGCCATTCATGCCAAGCGTGTTACTATCATGCCCAAGGACATTCAGCTTGCCAGGCGCATTAGGGGC…
			>GmHH3-3 (CDS in Zhonghuang 13)
			ATGGCTCGAACGAAGCAAACGGCCCGCAAGTCAACCGGCGGCAAGGCGCCGCGGAAGCAGCTGGCGACTAAGGCGGCTCGCAAGTCGGCTCCGGCGACCGGCGGCGTGAAGAAGCCGCACAGATTCAGGCCGGGAACCGTGGCGCTGCGCGAGATCCGGAAGTACCAGAAGAGCACGGAGCTACTCATCCGGAAGCTTCCGTTCCAGCGCTTGGTCCGAGAGATCGCGCAGGACTTCAAGACCGACCTCCGGTTCCAGAGCTCCGCCGTCTCCGCGCTCCAGGAGGCCGCCGAGGCTTACTTGGTCGGTCTCTTCGAAGACACGAACCTCTGCGCCATTCATGCCAAGCGTGTTACTATCATGCCCAAGGACATTCAGCTTGCCAGGCGCATTAGGGGC…
		FAM – attached for allele T	GmHH3-3-R1-1: GAAGGTGACCAAGTTCATGCTGAGTAGCTCCGTGCTCTTCTGA
		HEX attached for allele C	GmHH3-3-R1-2: GAAGGTCGGAGTCAACGGATTGAGTAGCTCCGTGCTCTTCTGG
		Common primer (Forward)	GmHH3-3-Fcom: CGTGGCGCTGCGCGAGATCCG

## Sheet: Table S2
		Recipe of GmHH3-3 KASP assay for 1 sample
		Ingredients	Volume
		KASP Master-Mix	2.5 µl
		MgCl2	0.04 µl
		ddH2O	0.305 µl
		Primer Mix	0.06 µl
		DNA	2 µl

## Sheet: Table S3
	HH3 gene IDs of 12 species
	Arabidopsis				G.max			O. sativa				S. tuberosum			T. cacao				Z.mays			Cicer arietinum			C. reinhardtii			S. moellendorfii			G. raimondii			A. comosus			V. vinifera
	Gene ID	Proposed Name			Gene ID	Proposed Name		Gene ID	Proposed Name			Gene ID	Proposed Name		Gene ID	Proposed Name			Gene ID	Proposed Name		Gene ID	Proposed name		Gene ID	Proposed Name		Gene ID	Proposed Name		Gene ID	Proposed Name		Gene ID	Proposed Name		Gene ID	Proposed Name
	AT1G01370	AtHH3-1	Centromeric		Glyma.05G188600.1	GmHH3-1		LOC_Os01g64640.1	OsHH3-1			PGSC0003DMP400002077	StHH3-1		Thecc1EG000234t1	TcHH3-1			GRMZM2G051879	ZmHH3-1		LOC_101507715	CaHH3-1		Cre12.g504650.t1.2	CreHH3-1		78992	SmHH3-1		Gorai.003G041300.1	GrHH3-1	H3.3	Aco000164.1	AcoHH3-1		GSVIVT01003423001	VvHH3-1
	AT1G09200	AtHH3-2	H3.1		Glyma.05G188700.1	GmHH3-2		LOC_Os02g25910.1	OsHH3-2			PGSC0003DMP400006732	StHH3-2		Thecc1EG001024t1	TcHH3-2			GRMZM2G078314	ZmHH3-2		LOC_101504416	CaHH3-2		Cre12.g504800.t1.2	CreHH3-2		103546	SmHH3-2		Gorai.004G040400.1	GrHH3-2	H3.1	Aco001241.1	AcoHH3-2		GSVIVT01006535001	VvHH3-2
	AT1G13370	AtHH3-3	H3.3 LIKE		Glyma.07G202500.1	GmHH3-3		LOC_Os02g25940.1	OsHH3-3			PGSC0003DMP400011206	StHH3-3		Thecc1EG001024t2	TcHH3-3			GRMZM2G118355	ZmHH3-3		LOC_101502470	CaHH3-3		Cre12.g505500.t1.2	CreHH3-3		171192	SmHH3-3		Gorai.004G277200.1	GrHH3-3	H3.1	Aco003152.1	AcoHH3-3		GSVIVT01009838001	VvHH3-3
	AT1G19890	AtHH3-4	H3.3 LIKE		Glyma.08G227400.1	GmHH3-4		LOC_Os03g27310.1	OsHH3-4			PGSC0003DMP400011232	StHH3-4		Thecc1EG001027t1	TcHH3-4			GRMZM2G130079	ZmHH3-4		LOC_101499832	CaHH3-4		Cre12.g506300.t1.2	CreHH3-4		176603	SmHH3-4		Gorai.004G277300.1	GrHH3-4	H3.3	Aco003157.1	AcoHH3-4		GSVIVT01018808001	VvHH3-4
	AT1G75600	AtHH3-5	H3.3 LIKE		Glyma.08G245000.1	GmHH3-5		LOC_Os04g34240.1	OsHH3-5			PGSC0003DMP400015132	StHH3-5		Thecc1EG001046t1	TcHH3-5			GRMZM2G145758	ZmHH3-5		LOC_101499531	CaHH3-5		Cre12.g506500.t1.2	CreHH3-5		269004	SmHH3-5		Gorai.005G111200.1	GrHH3-5	H3.3	Aco007850.1	AcoHH3-5
	AT3G27360	AtHH3-6	H3.1		Glyma.11G130900.1	GmHH3-6		LOC_Os05g36280.1	OsHH3-6			PGSC0003DMP400028214	StHH3-6		Thecc1EG034859t1	TcHH3-6			GRMZM2G171387	ZmHH3-6		LOC_101499212	CaHH3-6		Cre13.g569950.t1.2	CreHH3-6		438193	SmHH3-6		Gorai.009G018200.1	GrHH3-6	H3.1	Aco015756.1	AcoHH3-6
	AT4G40030	AtHH3-7	H3.3		Glyma.11G241700.1	GmHH3-7		LOC_Os06g04030.1	OsHH3-7			PGSC0003DMP400029337	StHH3-7		Thecc1EG038063t1	TcHH3-7			GRMZM2G176358	ZmHH3-7		LOC_101496454	CaHH3-7		Cre16.g661450.t1.2	CreHH3-7					Gorai.009G234200.1	GrHH3-7	H3.3	Aco016591.1	AcoHH3-7
	AT4G40040	AtHH3-8	H3.3		Glyma.11G241800.1	GmHH3-8		LOC_Os06g06460.1	OsHH3-8			PGSC0003DMP400039599	StHH3-8		Thecc1EG040550t1	TcHH3-8			GRMZM2G179005	ZmHH3-8		LOC_101496274	CaHH3-8		Cre17.g708150.t1.2	CreHH3-8					Gorai.010G171000.1	GrHH3-8	H3.3	Aco017390.1	AcoHH3-8
	AT5G10390	AtHH3-9	H3.1		Glyma.12G055200.1	GmHH3-9		LOC_Os06g06480.1	OsHH3-9			PGSC0003DMP400043823	StHH3-9		Thecc1EG040553t1	TcHH3-9			GRMZM2G355773	ZmHH3-9		LOC_101488238	CaHH3-9		Cre17.g709050.t1.2	CreHH3-9					Gorai.011G056400.1	GrHH3-9	H3.1	Aco018209.1	AcoHH3-9
	AT5G10400	AtHH3-10	H3.1		Glyma.13G173100.1	GmHH3-10		LOC_Os06g06510.1	OsHH3-10			PGSC0003DMP400043824	StHH3-10						GRMZM2G376957	ZmHH3-10		LOC_101503391	CaHH3-10		Cre17.g713550.t1.2	CreHH3-10					Gorai.011G056500.1	GrHH3-10	H3.1	Aco018240.1	AcoHH3-10
	AT5G10980	AtHH3-11	H3.3		Glyma.13G342000.1	GmHH3-11		LOC_Os11g05730.1	OsHH3-11			PGSC0003DMP400043844	StHH3-11						GRMZM2G401581	ZmHH3-11		LOC_101500161	CaHH3-11		Cre17.g714650.t1.2	CreHH3-11					Gorai.011G110600.1	GrHH3-11	H3.1
	AT5G12910	AtHH3-12	H3.3 LIKE		Glyma.14G217100.1	GmHH3-12		LOC_Os12g22650.1	OsHH3-12			PGSC0003DMP400053707	StHH3-12						GRMZM2G418258	ZmHH3-12		LOC_101494545	CaHH3-12								Gorai.013G154100.1	GrHH3-12	H3.1
	AT5G65350	AtHH3-13	H3.1 LIKE		Glyma.15G032300.1	GmHH3-13		LOC_Os12g22680.1	OsHH3-13			PGSC0003DMP400055010	StHH3-13						GRMZM2G447984	ZmHH3-13											Gorai.013G250500.1	GrHH3-13	H3.1
	AT5G65360	AtHH3-14	H3.1		Glyma.15G222200.1	GmHH3-14						PGSC0003DMP400055218	StHH3-14						GRMZM2G451254	ZmHH3-14
					Glyma.18G015200.1	GmHH3-15													GRMZM2G475899	ZmHH3-15
					Glyma.18G015300.1	GmHH3-16													GRMZM5G864735	ZmHH3-16
					Glyma.18G266200.1	GmHH3-17

## Sheet: Table S4
	Biophysical properties
	Gene name	Locus ID	Chromosome	start	End	Strand	CDs (bp)	Protein length (aa)	MW (KDa)	pl	Gravy	Localozation	No.of introns/exons	Phytozome description
	GmHH3-1	Glyma.05G188600.1	5	37448126	37449098	-	411	136	15.2839	11.29	-0.57	Nucleus	00:01:00	1 of 22) K11253 - histone H3 (H3)
	GmHH3-2	Glyma.05G188700.1	5	37450637	37451891	-	411	136	15.2839	11.29	-0.57	Nucleus	00:01:00	(1 of 22) K11253 - histone H3 (H3)
	GmHH3-3	Glyma.07G202500.1	7	37177013	37177959	-	411	136	15.2839	11.29	-0.57	Nucleus	00:01:00	(1 of 22) K11253 - histone H3 (H3)
	GmHH3-4	Glyma.08G227400.1	8	18516376	18517463	+	411	136	15.2839	11.29	-0.57	Nucleus	00:01:00	(1 of 22) K11253 - histone H3 (H3)
	GmHH3-5	Glyma.08G245000.1	8	21160139	21161097	-	411	136	15.2839	11.29	-0.57	Nucleus	00:01:00	(1 of 22) K11253 - histone H3 (H3)
	GmHH3-6	Glyma.11G130900.1	11	9993710	9994120	-	411	136	15.2839	11.29	-0.57	Nucleus	00:01:00	(1 of 22) K11253 - histone H3 (H3)
	GmHH3-7	Glyma.11G241700.1	11	33581449	33584216	-	798	265	30.4802	10.1	-0.535	Nucleus	05:06:00	(1 of 22) K11253 - histone H3 (H3)
	GmHH3-8	Glyma.11G241800.1	11	33586053	33587570	+	411	136	15.4061	11.15	-0.602	Nucleus	03:04:00	(1 of 22) K11253 - histone H3 (H3)
	GmHH3-9	Glyma.12G055200.1	12	3998947	3999707	-	411	136	15.2839	11.29	-0.57	Nucleus	00:01:00	(1 of 22) K11253 - histone H3 (H3
	GmHH3-10	Glyma.13G173100.1	13	28720656	28721572	+	411	136	15.2839	11.29	-0.57	Nucleus	00:01:00	(1 of 22) K11253 - histone H3 (H3
	GmHH3-11	Glyma.13G342000.1	13	43366276	43366808	+	411	136	15.2839	11.29	-0.57	Nucleus	00:01:00	(1 of 22) K11253 - histone H3 (H3
	GmHH3-12	Glyma.14G217100.1	13	48198344	48199648	-	411	136	15.4061	11.15	-0.602	Nucleus	03:04:00	(1 of 22) K11253 - histone H3 (H3
	GmHH3-13	Glyma.15G032300.1	15	2596749	2598273	-	411	136	15.2839	11.29	-0.57	Nucleus	00:01:00	(1 of 22) K11253 - histone H3 (H3
	GmHH3-14	Glyma.15G222200.1	15	40200018	40200696	-	411	136	15.2839	11.29	-0.57	Nucleus	00:01:00	(1 of 22) K11253 - histone H3 (H3
	GmHH3-15	Glyma.18G015200.1	18	1091486	1093447	+	561	186	21.3673	10.89	-0.409	Nucleus	04:05:00	(1 of 22) K11253 - histone H3 (H3
	GmHH3-16	Glyma.18G015300.1	18	1093880	1095639	+	411	136	15.4061	11.15	-0.602	Nucleus	03:04:00	(1 of 22) K11253 - histone H3 (H3
	GmHH3-17	Glyma.18G266200.1	18	55065716	55066843	-	411	136	15.2839	11.29	-0.57	Nucleus	00:01:00

## Sheet: Table S5
	Collinearity/synteny and Ka/Ks anlysis of GmHH3 gene family
		Gene				Orthologous/paralogous				Ka/Ks estimation
	Sr#	Gene	Chromosomal position	start	end	Gene	Chromosomal position	start	end	Ka	Ks	Ka_Ks
	1	Glyma.07G202500.1	Chr07	37177013	37177959	Glyma.13G173100.1	Chr13	28720656	28721572	0.00329038	0.467914	0.00703202
	2	Glyma.08G245000.1	Chr08	21160139	21161097	Glyma.18G266200.1	Chr18	55065716	55066843	0.0032415	0.264081	0.0122746
	3	Glyma.08G227400.1	Chr08	18516376	18517463	Glyma.15G222200.1	Chr15	40200018	40200696	0.00328138	0.437436	0.0075014
	4	Glyma.11G130900.1	Chr11	9993710	9994120	Glyma.13G342000.1	Chr13	43366276	43366808	0.00653777	1.01351	0.00645063
	5	Glyma.12G055200.1	Chr12	3998947	3999707	Glyma.15G032300.1	Chr15	2596749	2598273	0.00652533	1.10896	0.00588418
	6	Glyma.12G055200.1	Chr12	3998947	3999707	Glyma.13G342000.1	Chr13	43366276	43366808	0.00653955	0.974462	0.00671093
	7	Glyma.11G241700.1	Chr11	33581449	33584216	Glyma.18G015200.1	Chr18	1091486	1093447	0.116262	0.542501	0.214307
	8	Glyma.11G130900.1	Chr11	9993710	9994120	Glyma.15G032300.1	Chr15	2596749	2598273	0.00652355	1.43607	0.00454264
	9	Glyma.13G342000.1	Chr13	43366276	43366808	Glyma.15G032300.1	Chr15	2596749	2598273	0	0.300395	0
	10	Glyma.14G217100.1	Chr14	48198344	48199648	Glyma.17G255600.1	Chr17	40970201	40972602	0.209818	0.524787	0.399816
	Gene Duplication Analysis in GmHH3 gene family
	Sr#	Gene ID	Rename	Duplication type
	1	Glyma.05G188600.1	GmHH3-1	Dispersed
	2	Glyma.05G188700.1	GmHH3-2	Dispersed
	3	Glyma.07G202500.1	GmHH3-3	WGD or Segmental
	4	Glyma.08G227400.1	GmHH3-4	WGD or Segmental
	5	Glyma.08G245000.1	GmHH3-5	WGD or Segmental
	6	Glyma.11G130900.1	GmHH3-6	WGD or Segmental
	7	Glyma.11G241700.1	GmHH3-7	WGD or Segmental
	8	Glyma.11G241800.1	GmHH3-8	Tandem
	9	Glyma.12G055200.1	GmHH3-9	WGD or Segmental
	10	Glyma.13G173100.1	GmHH3-10	WGD or Segmental
	11	Glyma.13G342000.1	GmHH3-11	WGD or Segmental
	12	Glyma.14G217100.1	GmHH3-12	WGD or Segmental
	13	Glyma.15G032300.1	GmHH3-13	WGD or Segmental
	14	Glyma.15G222200.1	GmHH3-14	WGD or Segmental
	15	Glyma.18G015200.1	GmHH3-15	WGD or Segmental
	16	Glyma.18G015300.1	GmHH3-16	Tandem
	17	Glyma.18G266200.1	GmHH3-17	WGD or Segmental

## Sheet: Table S6
	cis-elements
	Sr#	Gene Names	Growth and Development	Light Response	Stress Response
	1	GmHH3-1	CAT-box,CAAT-box,CCAAT-Box,CCGTCC-motif,GCN4-motif,TATA-box,A-box	Box II,GT1-motif,MRE	ARE,ERE,LTR,MBS,MYB
	2	GmHH3-2	CAAT-box,CCAAT-box,TATA-box,A-box,dOCT	3AF1-binding site,ATC-motif,Box 4,G-box,GT1-motif	ABRE,ARE,ERE,GARE-motif,GCN4-motif,LTR,MBS,MYB,RY-element,TATC-box,TCA-element,TGA-element,W-box,WUN-motif
	3	GmHH3-3	A-box,CAAT-box,CCAAT-box,TATA-box,as-1,CCAAT-box,Doct	AAC-motif,Box 4,AT1-motif,G-box,GATA-motif,Sp1,TCT-motif	ABRE,CGTCA-motif,TGACG-motif,WUN-mmotif
	4	GmHH3-4	AT-rich element,CAAT-box,CCAAT-box,TATA-Box,Doct	AT1-motif,Box 4,Box III, GA-motif, GARE-motif,Sp1, TCT-motif,chs-CMA2b	ARE-AuxRR-core,ERE,GCN4-motif,MYB,TC-rich repeats,TGA-element,W-box,WUN-motif
	5	GmHH3-5	CAT-box,CAAT-box,CCAAT-Box,CCGTCC-motif,TATA-box,O2-site,dOCT,cicardian	ACE,AE-box,Box 4,Box II,G-box,G-Box,GATA-motif,GT1-motif,L-box,TCCC-motif,TCT-motif,chs-CMA1a	ABRE,ARE,AT-rich element,MYB,TC-rich repeats,TCA-element,TGA-element,TGACG-motif,WUN-motif
	6	GmHH3-6	CAAT-box,CCAAT-box,TATA-box,O2-site	Box 4,G-box,GA-motif,GATA-motif,LAMP element,GT1-motif,TCT-motif,chsCMA1a	ABRE-ARE-GCN4-motif,MBS,MYB,p-box,TCA-element,TGA-element
	7	GmHH3-7	CAAT-BOX,CCAAT-box,TATA-box,cicardian	Box 4,TCCC-motif	ARE,ERE,GARE-motif,GC-motif,MBS,GCN4-motif,LTR,TC rich repeats,TGA element,W box
	8	GmHH3-8	CAAT-box,CCAAT-box,TATA-box	Box 4,TCCC-motif,TCT-motif	ABRE,ARE,ERE,MBS,MYB,LTR,GARE-motif,TC-rich repeats,TGA element,WUN-motif
	9	GmHH3-9	CAAT-box,CCAAT-box,TATA-box	AE-box,ATC-motif,Box 4,G-Box,G-box,GA-motif,GT1-motif,I-box,LAMP element,TCT-motif,chsCMA2a	ABRE,ARE,ERE,MYB.GCN4-motif,WUN-motif,p-box,TATC-box
	10	GmHH3-10	A-box,CAAT-box,CCAAT-box,TATA-box	Box 4,G-Box,G-box,GATA-motif,Gpa-box,I-box,sp1,TCT-motif	ABRE,ARE,ERE,MYB,TGACG-motif,WUN-motif
	11	GmHH3-11	CCAAT-box,CAAT-box,TATA-box,as1,dOCT	AT1-motif,ATC-motif,Box 4,GARE-motif,GT1-motif,TCT-motif	ARE,CGTCA-motif,ERE,GC-motif,LTR,MBS,MYB,TGA element,TGACG-motif,WUN-motif
	12	GmHH3-12	CAAT-box,CCAAT-box,TATA-box,as1	ATCT-motif,Box 4,Box II,G-Box,G-box,GARE-motif	ABRE,ARE,AT rich element,CGTCA-motif,GCN4-motif,LTR,MBS,MYB,TC rich repeats,TCA element,TGACG-motif,WUN-motif
	13	GmHH3-13	CAT-box,CCAAT-box,O2-site,TATA-box	Box-4,Gbox,GT1-motif	ARE,ERE,MBS,MYB,TCA element,TGA element,WUN-motif
	14	GmHH3-14	A-box,CAAT-box,TATA-box,as-1	Box 4,G-box,G-Box,Box III,GARE-motif,I-box,sp1	ABRE,AuxRR-core,CGTCA-motif,ERE,MYB,MBS,TC rich repeats,TC element
	15	GmHH3-15	CAAT-box,CAT-box,CCAAT-box,TATA-box	AE-Box,Box 4,AT1-motif,G-Box,G-box,GARE- motif,GATA-motif,TCT-motif	ABRE,ARE,ERE,LTR,MYB,AT rich element,TC rich repeats,WUN -motif
	16	GmHH3-16	A-box,CAT-box,CAAT-box,CCAAT-box,TATA-box,cicardian	ATC-motif,Box 4,g-BOX,GARE-motif,chsCMA1a	ABRE,ARE,MBS,MYB,TC rich repeats,TCA element,WUN-motif
	17	GmHH3-17	CAAT-box,CCAAT-box,TATA-box	Box 4,GARE-motif,GATA-motif,GT1-motif,TCT-motif,chsCMA1a	ARE,CGTCA-motif,ERE,LTR,MBS,p-box,TGACG-motif
